# Supplementary material
Source: PubMed Central journal article supplement (PMC8204386)
Supplement: mmc1.pdf [file mmc1.pdf]

**Biophysical Journal, Volume 120**

**Supplemental information**

**Intrachain interaction topology can identify functionally similar intrinsically disordered proteins**

**Jonathan Huihui and Kingshuk Ghosh**

This supporting material contains principal component plot for PSC protein family, Euclidean distance matrices (used to classify proteins in a family), Sequence Charge Decoration matrices (*SCDM*) presented as color coded maps for PSC and RAM family. It also contains methods and results for three control studies: i) using charge composition, ii) shuffling the *bSCDM* matrices to see the role of topology of the charge decoration matrices, and iii) charge product matrices. We also provide color-coded  $K_d$  values for RAM sequences, and the sequences that were used for Ste50, PSC, and RAM families.

## First 2 Principal Component Plot for PSC

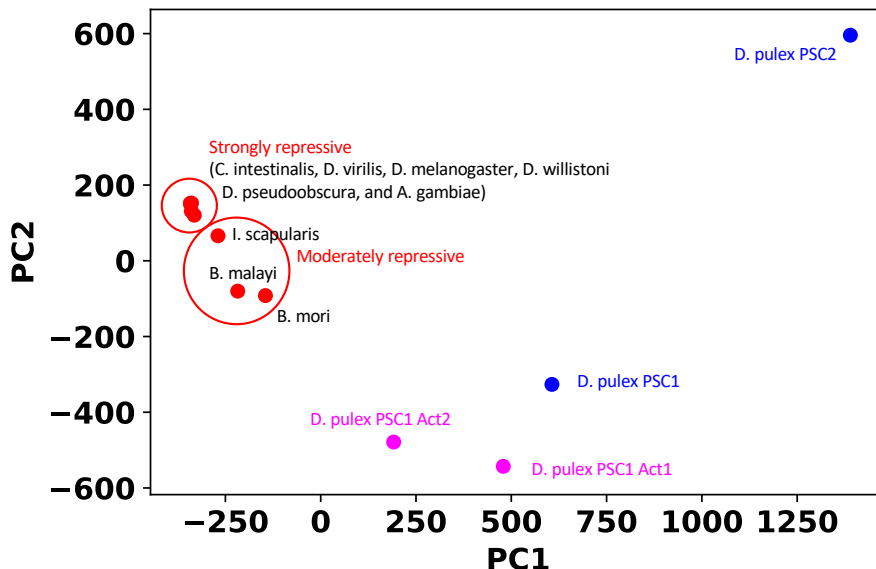

Figure S1: **Scatter Plot of the First 2 Principal Components of PSC.** PSC family proteins represented in terms of the first two principal components. Collectively, PC1 and PC2 account for 74% of the variance (56% and 18% respectively). Classification using two PCs is in line with that shown in Figure 3 of the main manuscript.

## Distance Matrices Used for Clustering

Here we include the distance matrices that represent the distances between the Principal Components of each protein within a family.

|                 | <b>RAD26</b> | <b>SC5A</b> | <b>SCCharge</b> | <b>LKCharge</b> | <b>PEX5</b> |
|-----------------|--------------|-------------|-----------------|-----------------|-------------|
| <b>RAD26</b>    | 0.0          | 131.2       | 127.0           | 138.7           | 143.0       |
| <b>SC5A</b>     | 131.2        | 0.0         | 80.9            | 78.0            | 93.2        |
| <b>SCCharge</b> | 127.0        | 80.9        | 0.0             | 27.4            | 69.5        |
| <b>LKCharge</b> | 138.7        | 78.0        | 27.4            | 0.0             | 45.7        |
| <b>PEX5</b>     | 143.0        | 93.2        | 69.5            | 45.7            | 0.0         |

Table S1: Euclidean distances between Principal Components of Ste50 proteins.

|               | <b>D. w.</b> | <b>Act2</b> | <b>B. mo.</b> | <b>A. g.</b> | <b>I. s.</b> | <b>D. ps.</b> | <b>D. p.2</b> | <b>D. p.1</b> | <b>D. v.</b> | <b>Act1</b> | <b>D. m.</b> | <b>C. i.</b> | <b>B. ma.</b> |
|---------------|--------------|-------------|---------------|--------------|--------------|---------------|---------------|---------------|--------------|-------------|--------------|--------------|---------------|
| <b>D. w.</b>  | 0            | 939         | 612           | 81           | 378          | 1.2           | 1803          | 1204          | 0.6          | 1162        | 56           | 11           | 525           |
| <b>Act2</b>   | 939          | 0           | 839           | 895          | 852          | 939           | 1649          | 971           | 938          | 744         | 908          | 938          | 792           |
| <b>B. mo.</b> | 612          | 839         | 0             | 545          | 315          | 612           | 1728          | 1067          | 612          | 1023        | 582          | 603          | 155           |
| <b>A. g.</b>  | 81           | 895         | 545           | 0            | 300          | 82            | 1793          | 1198          | 82           | 1134        | 39           | 74           | 449           |
| <b>I. s.</b>  | 378          | 852         | 315           | 300          | 0            | 379           | 1749          | 1216          | 378          | 1084        | 334          | 368          | 195           |
| <b>D. ps.</b> | 1.2          | 939         | 612           | 82           | 379          | 0             | 1803          | 1204          | 1.2          | 1163        | 57           | 12           | 525           |
| <b>D. p.2</b> | 1803         | 1649        | 1728          | 1793         | 1749         | 1803          | 0             | 1412          | 1803         | 1516        | 1800         | 1799         | 1766          |
| <b>D. p.1</b> | 1204         | 971         | 1067          | 1198         | 1216         | 1204          | 1412          | 0             | 1204         | 986         | 1213         | 1202         | 1144          |
| <b>D. v.</b>  | 0.6          | 938         | 612           | 82           | 378          | 1.2           | 1803          | 1204          | 0            | 1163        | 56           | 12           | 525           |
| <b>Act1</b>   | 1162         | 744         | 1023          | 1134         | 1084         | 1163          | 1516          | 986           | 1163         | 0           | 1141         | 1160         | 1022          |
| <b>D. m.</b>  | 56           | 908         | 582           | 39           | 334          | 57            | 1800          | 1213          | 56           | 1141        | 0            | 52           | 485           |
| <b>C. i.</b>  | 11           | 938         | 603           | 74           | 368          | 12            | 1799          | 1202          | 12           | 1160        | 52           | 0            | 516           |
| <b>B. ma.</b> | 525          | 792         | 155           | 449          | 195          | 525           | 1766          | 1144          | 525          | 1022        | 485          | 516          | 0             |

Table S2: **Euclidean distances between Principal Components of PSC-CTR proteins.** Protein names have been shortened due to formatting constraints. **D. p.2**, **D. p.1**, **Act2** and **Act1** denote *D. pulex PSC2*, *D. pulex PSC1*, *D. pulex1 Act2* and *D. pulex1 Act1* respectively.

|           | <b>9</b> | <b>12</b> | <b>7</b> | <b>3</b> | <b>4</b> | <b>11</b> | <b>1</b> | <b>5</b> | <b>10</b> | <b>13</b> | <b>2</b> | <b>6</b> | <b>8</b> | <b>WT</b> |
|-----------|----------|-----------|----------|----------|----------|-----------|----------|----------|-----------|-----------|----------|----------|----------|-----------|
| <b>9</b>  | 0.0      | 79.3      | 80.5     | 92.9     | 53.4     | 100.8     | 76.9     | 45.2     | 88.9      | 102.9     | 62.7     | 60.6     | 70.1     | 70.7      |
| <b>12</b> | 79.3     | 0.0       | 88.0     | 66.0     | 81.1     | 81.3      | 83.1     | 86.6     | 88.2      | 77.7      | 81.0     | 78.3     | 80.4     | 79.3      |
| <b>7</b>  | 80.5     | 88.0      | 0.0      | 65.6     | 62.4     | 61.9      | 45.8     | 64.6     | 35.1      | 64.4      | 39.5     | 66.0     | 57.5     | 33.7      |
| <b>3</b>  | 92.9     | 66.0      | 65.6     | 0.0      | 78.0     | 42.0      | 45.4     | 80.0     | 57.9      | 43.4      | 64.1     | 75.6     | 72.8     | 55.3      |
| <b>4</b>  | 53.4     | 81.1      | 62.4     | 78.0     | 0.0      | 89.3      | 59.4     | 22.7     | 71.9      | 90.8      | 35.0     | 39.7     | 65.2     | 49.4      |
| <b>11</b> | 100.8    | 81.3      | 61.9     | 42.0     | 89.3     | 0.0       | 66.0     | 89.2     | 48.6      | 9.7       | 77.4     | 87.7     | 85.0     | 70.9      |
| <b>1</b>  | 76.9     | 83.1      | 45.8     | 45.4     | 59.4     | 66.0      | 0.0      | 61.8     | 44.1      | 70.9      | 40.6     | 62.7     | 61.2     | 26.2      |
| <b>5</b>  | 45.2     | 86.6      | 64.6     | 80.0     | 22.7     | 89.2      | 61.8     | 0.0      | 74.5      | 91.7      | 40.3     | 52.9     | 58.8     | 53.6      |
| <b>10</b> | 88.9     | 88.2      | 35.1     | 57.9     | 71.9     | 48.6      | 44.1     | 74.5     | 0.0       | 53.5      | 60.2     | 76.1     | 69.6     | 49.9      |
| <b>13</b> | 102.9    | 77.7      | 64.4     | 43.4     | 90.8     | 9.7       | 70.9     | 91.7     | 53.5      | 0.0       | 79.5     | 87.7     | 85.5     | 74.1      |
| <b>2</b>  | 62.7     | 81.0      | 39.5     | 64.1     | 35.0     | 77.4      | 40.6     | 40.3     | 60.2      | 79.5      | 0.0      | 44.3     | 56.6     | 20.5      |
| <b>6</b>  | 60.6     | 78.3      | 66.0     | 75.6     | 39.7     | 87.7      | 62.7     | 52.9     | 76.1      | 87.7      | 44.3     | 0.0      | 70.9     | 56.1      |
| <b>8</b>  | 70.1     | 80.4      | 57.5     | 72.8     | 65.2     | 85.0      | 61.2     | 58.8     | 69.6      | 85.5      | 56.6     | 70.9     | 0.0      | 58.2      |
| <b>WT</b> | 70.7     | 79.3      | 33.7     | 55.3     | 49.4     | 70.9      | 26.2     | 53.6     | 49.9      | 74.1      | 20.5     | 56.1     | 58.2     | 0.0       |

Table S3: **Euclidean distances between Principal Components of RAM permutations.**

## Sequence charge decoration matrices for PSC-CTR

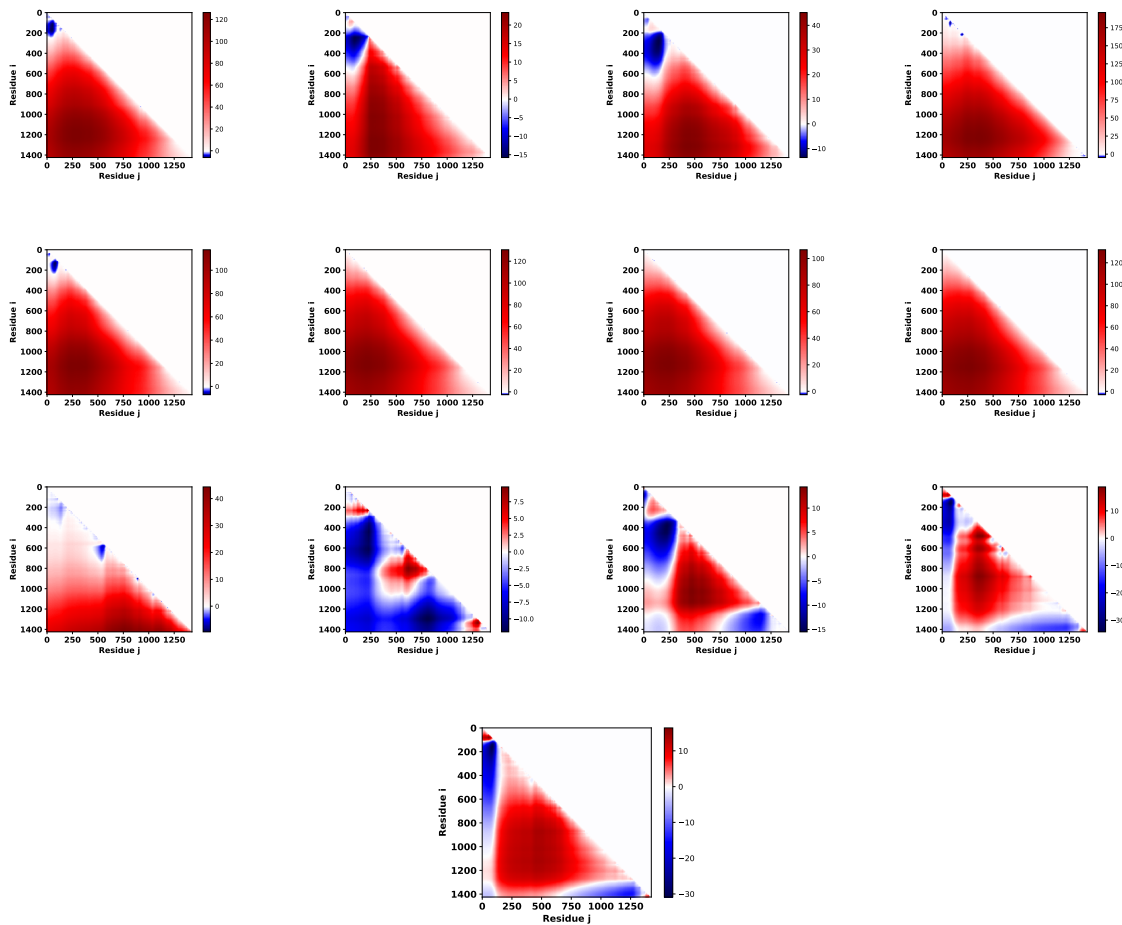

Figure S2: **Sequence Charge Decoration Matrices for PSC-CTR offer further visual evidence for links to function.** The color coding above depicts where electrostatics is predicted to promote expansion (red) or compaction (blue). From top left to bottom right, the rescaled *SCDMs* are included for *A. gambiae*, *B. malayi*, *B. mori*, *C. intestinalis*, *D. melanogaster*, *D. pseudoobscura*, *D. virilis*, *D. willistoni*, *I. scapularis*, *D. pulex2*, *D. pulex1*, *D. pulex1 Act1*, and *D. pulex1 Act2*. There is a clear visual trend in the matrices that distinguish inhibitory and non-inhibitory sequences, see main text for discussion.

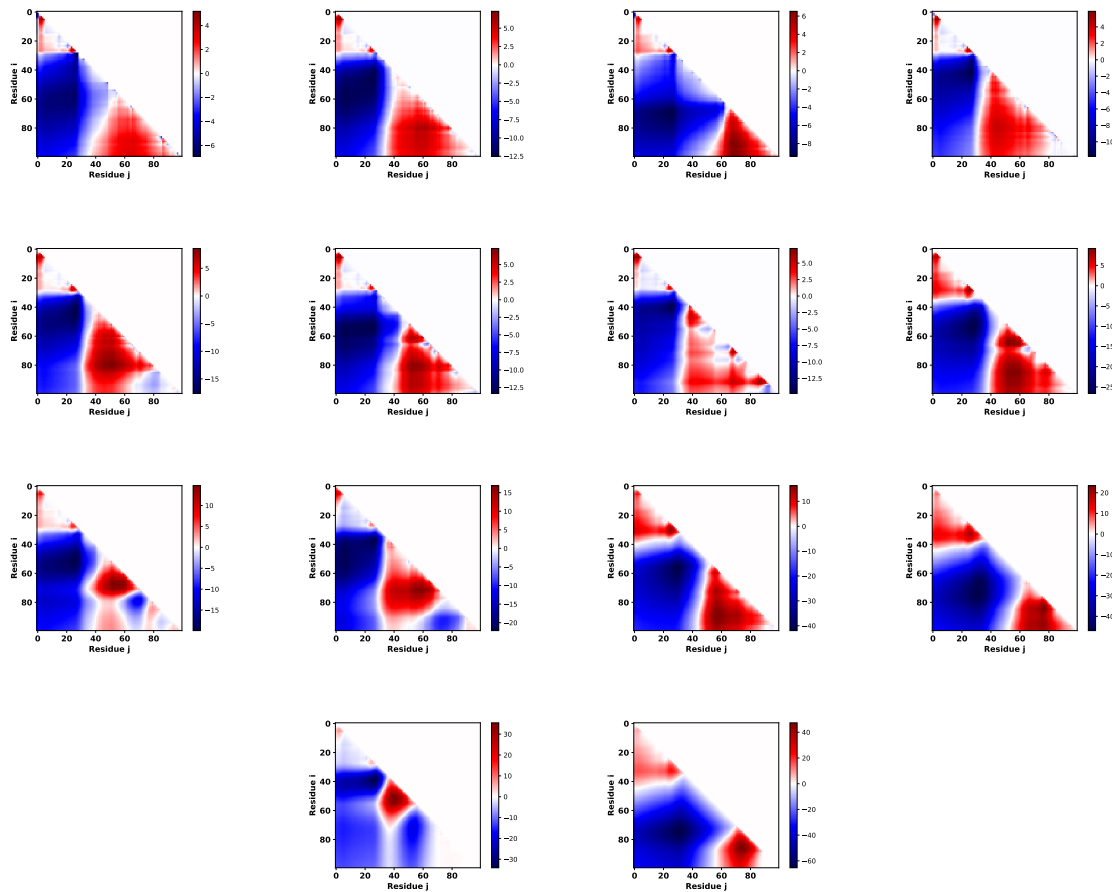

Figure S3: **Sequence Charge Decoration Matrices for RAM sequences provide visual evidence for overall trend.** The color coding above shows regions where electrostatics is predicted to promote expansion (red) or compaction (blue). *SCDMs* are included for (from top left to bottom right) RAM 1, 2, 3, 4, 5, WT, 6, 7, 8, 9, 10, 11, 12, and 13. RAM 12 is visually different from all the others and RAM 3, 11, and 13 look similar, agreeing with the dendrogram in the main text. See main text for discussion.

## Composition Based Clustering

### Methods

Clustering was performed with the fraction of positive and negative residues as independent coordinates. The same hierarchical agglomerative clustering algorithm as clustering with binary SCDMs was then employed to determine which proteins were most similar to each other by the Euclidean distance between these individual coordinates. This method was not used for the RAM proteins because all of the sequences were generated by shuffling the original sequence while maintaining the same composition.

### Results

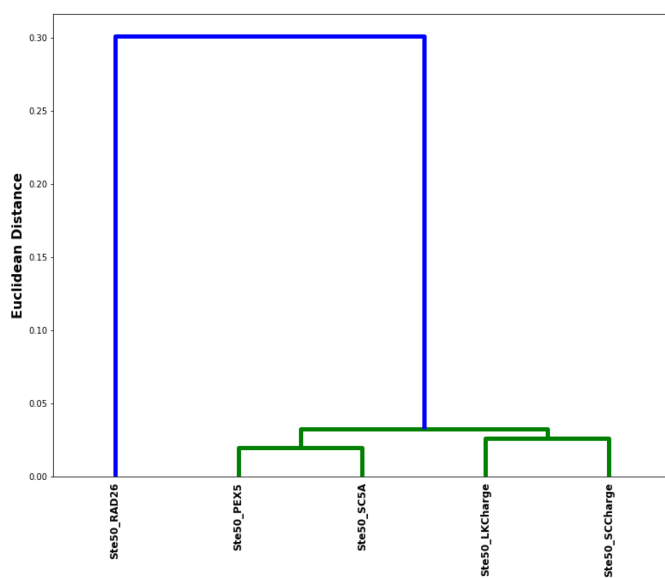

Figure S4: **Compositional clustering for Ste50.** The panel shows the resulting dendrogram based on the clustering by charge composition for the Ste50 proteins. This method clusters non-functional SC5A and functional PEX5 together demonstrating the inadequacy of the algorithm.



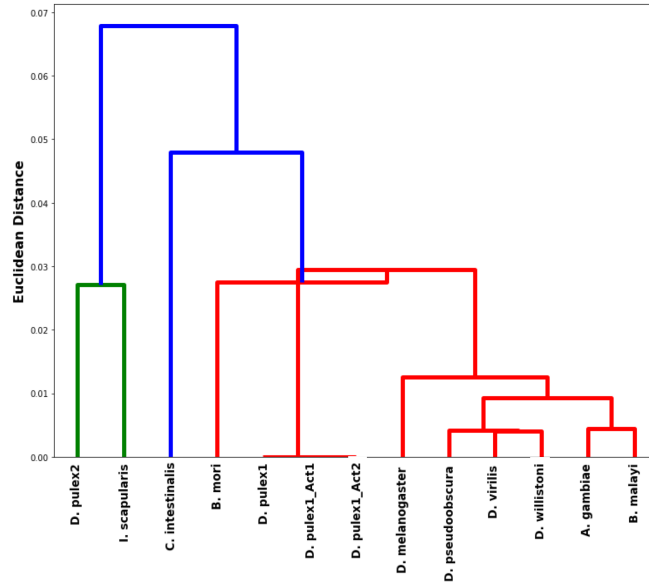

Figure S5: **Compositional clustering for PSC-CTR.** The panel shows the resulting dendrogram based on the clustering by charge composition for the PSC-CTR proteins. Non-repressive and repressive proteins are clustered together indicating inability of this metric to properly classify proteins.

## Clustering using shuffled matrices Methods

Binarized sequence charge decoration matrices ( $bSCDM$ ) were calculated for all of the proteins and were randomly shuffled, with the average  $bSCDM$  tracked. The amount of times the  $bSCDM$  matrices were shuffled depended on the cumulative change in the average  $bSCDM$ . A mathematical representation of this criteria would be  $\delta = \sum_{i=2}^N \sum_{j=1}^i |\langle bSCDM_{i,j} \rangle_T - \langle bSCDM_{i,j} \rangle_{T+1}|$ , where  $\langle bSCDM_{i,j} \rangle_T$  is the average of the binary sequence charge decoration matrix after  $T$  iterations and  $\delta$  is the difference between the average at the  $T$  and  $T + 1$  iteration. The average matrix was then subjected to the same PCA and clustering technique used to create the dendrogram. Multiple  $\delta$  values were tested and resulted in  $10^5$  to  $10^6$  iterations performed for each individual matrices. The dendrograms were compared at each  $\delta$  value and the appropriate  $\delta$  value was chosen after visually determining the dendrogram did not significantly change (not shown).

## Results

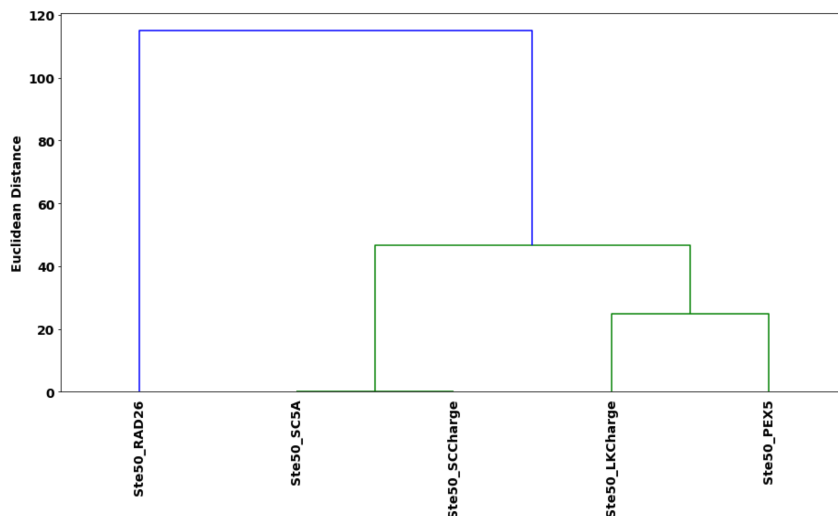

Figure S6: **Results of shuffling the topology of the  $bSCDM$  matrix for Ste50.** The dendrogram based on the clustering of the Principal Components (capturing about 100% of the variance) of the average binary sequence charge decoration matrices does not agree with experimental data. For example, SCCharge (functional) and SC5A (non-functional) are clustered together.

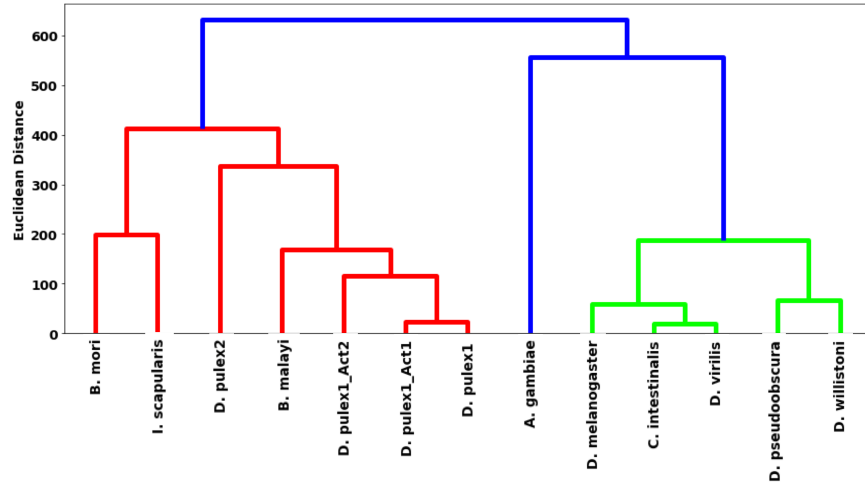

Figure S7: **Results of shuffling the topology of the *bSCDM* matrix for PSC-CTR.** The dendrogram based on the clustering of the Principal Components (capturing about 97% of the variance) of the average binary sequence charge decoration matrices does not agree with experimental data. For example, non-repressive (*D. pulex PSC1*, *D. pulex PSC2*) and repressive proteins are clustered together. See main text for more.

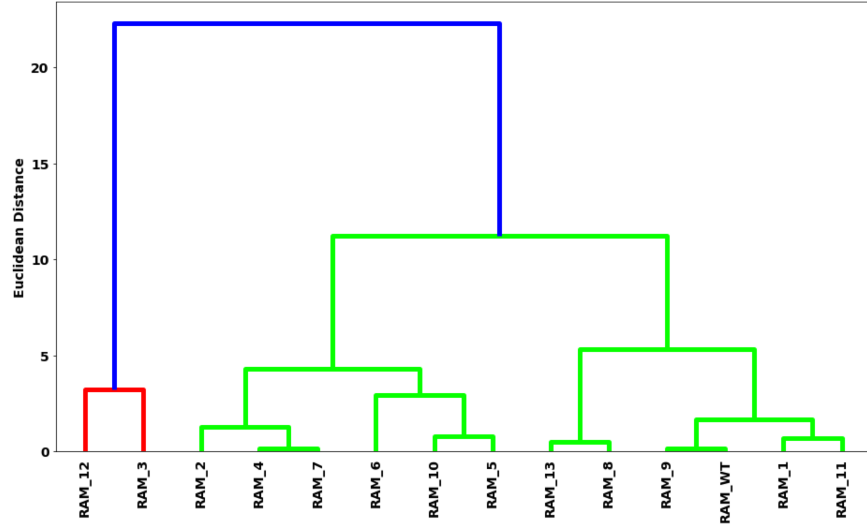

Figure S8: **Results of shuffling the topology of the  $bSCDM$  matrix for RAM.** The dendrogram based on the clustering of the Principal Components (capturing about 99% of the variance) of the average binary sequence charge decoration matrices does not agree with classification using experimentally measured  $K_d$  data. See main text for more.

## Control using charge-product Calculation

### Methods

charge decoration matrices were calculated for all of the proteins within a family by using a charge product (CP) matrix defined as:

$$[CP]_{i,j} = q_i q_j \quad (S1)$$

where  $q$  is equal to +1 for positively charged amino acids (Lysine and Arginine), -1 for negatively charged amino acids (Glutamic and Aspartic acids), and 0 for all others.  $CP$  matrices are then rescaled to the largest protein as done previously. Principal Components were then calculated within a family of proteins and these components were then clustered in the same fashion as before.

### Results

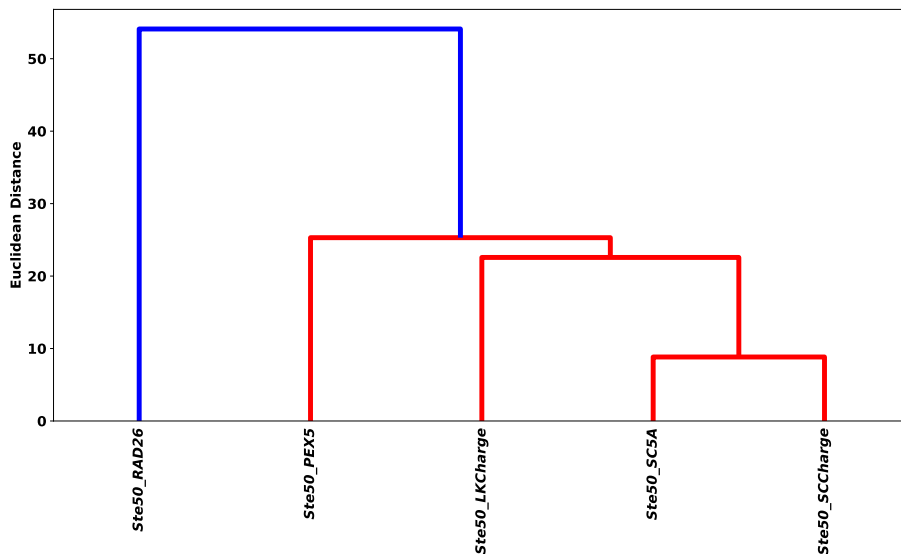

Figure S9: **Clustering based on charge product  $CP$  matrix used for Ste50.** The dendrogram based on the Principal Components (capturing about 100% of the variance) of the charge product matrix correctly classifies RAD26 outside of the functional proteins, however it incorrectly clusters SC5A within the functional protein group.

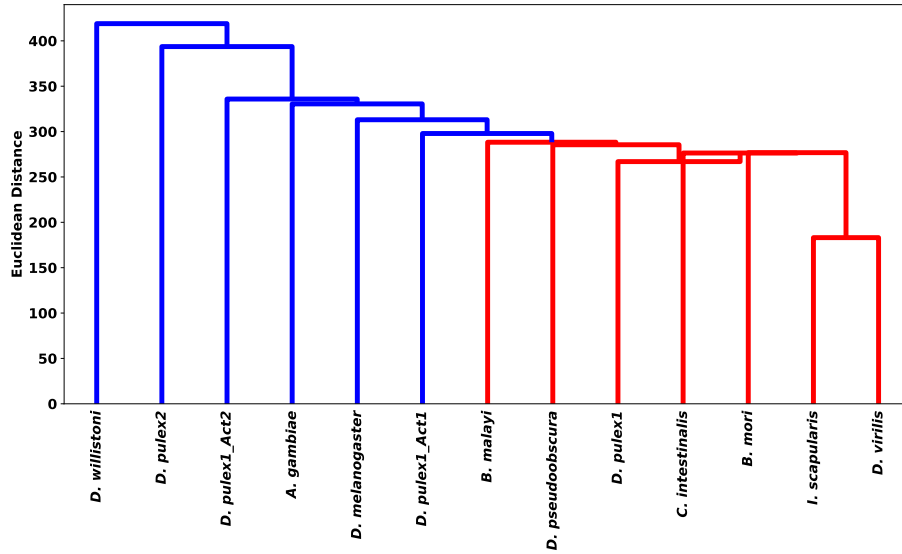

Figure S10: **Clustering based on charge product  $CP$  matrix used for PSC.** The dendrogram based on the Principal Components (capturing about 96% of the variance) of the charge product matrix incorrectly groups strongly repressive, moderately repressive, and non-repressive proteins together (red cluster).

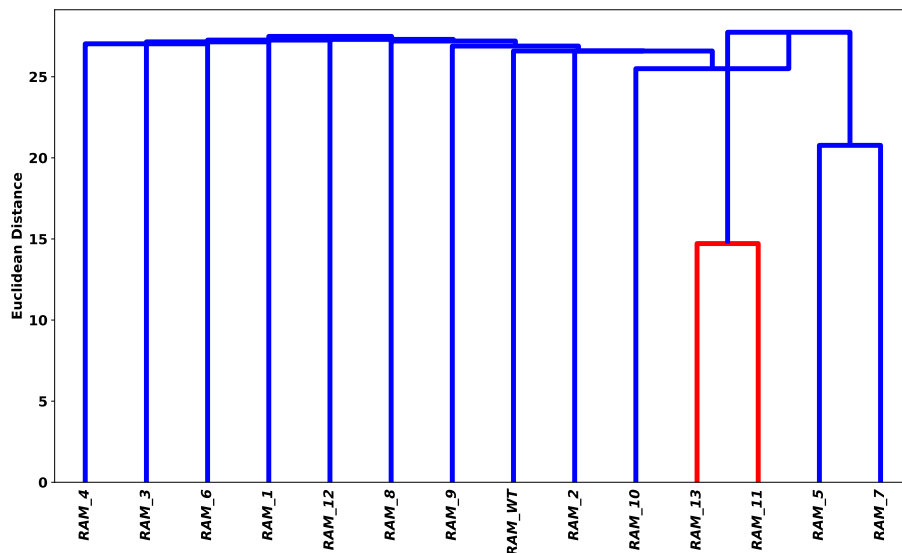

Figure S11: **Clustering based on charge product  $CP$  matrix used for RAM.** The dendrogram based on the Principal Components (capturing about 92% of the variance) of the charge product matrix reveals no trend between sequence patterning and  $K_d$ .

## Color-coded $K_d$ values for RAMANK sequences

| Protein   | $K_d$ (nM) |
|-----------|------------|
| RAMANK 1  | 10.1       |
| RAMANK 2  | 11.3       |
| RAMANK 3  | 11.8       |
| RAMANK 4  | 9.7        |
| RAMANK 5  | 16.2       |
| RAMANK 6  | 22.3       |
| RAMANK 7  | 17.2       |
| RAMANK 8  | 11.8       |
| RAMANK 9  | 18.9       |
| RAMANK 10 | 32.2       |
| RAMANK 11 | 29.1       |
| RAMANK 12 | 99         |
| RAMANK 13 | 38.5       |
| RAMANK WT | 9.2        |

Table S4: **Experimentally measured  $K_d$  values for RAMANK.** Color coding corresponding to clustering using our theoretical algorithm shown in the main text.

## Sequences Used For Classifications

| Protein         | Sequence                                                                                                               |
|-----------------|------------------------------------------------------------------------------------------------------------------------|
| <b>RAD26</b>    | DTANREYAKNDEQKDEDFEMATEQMVENLTDEDDNLSDQDYQMSGKESEDD<br>EEEENDDKILKELEDLRFRGQPGEAK                                      |
| <b>SC5A</b>     | DVLDVMKTSSSSAPINTHGVSTTVPSSNNTIIPSSDGVSLSQTDYFDTVHN<br>RQAPSRREAPVTVFRQPSLSHSLHSDSKNKVPQISTNQSHPSAVSTANA<br>PGPAPNEALK |
| <b>SCCharge</b> | DVLDVMKTSSSSSPINTHGVSTTVPSSNNTIIPSSDGVSLSQTDYFDTVHN<br>RQSPSRRESPVTVFRQPSLSHSLHSDSKNKVPQISTNQSHPSAVSTANE<br>EGPEENEALK |
| <b>LKCharge</b> | DVLELIRNNGNINTTEESFGTQPQPTGDYFDQQKHPLIINGSSGTTNNLG<br>SNGSKSSVLRSGSSTASVPALASSNSFGGEEGGNSTNEPLK                        |
| <b>PEX5</b>     | LIDDKRRMEIGPSSGRLPPFSNVHSLQTSANPTQIKGVNDISHWSQEFQGS<br>NSIQNRNADTGNSEKAWQRGSTTASSRFQYPNTM                              |

Table S5: Sequences used for the Ste50 proteins.



| Protein | Sequence                                                                                                   |
|---------|------------------------------------------------------------------------------------------------------------|
| RAM 1   | DDRKRRRQHGQLWFPEGFKVSEASKKKRREDLEKTVVQELTWPALLANKES<br>QTERNDLLLLGDFKDGEPNGMALDSMHVPAGPMFRDEQDARWDQHKDQD   |
| RAM 2   | MARKRRRQHGQLWFPEGFKVSEASKKKRRDPLGKESVGLDPLDNASDGALM<br>DRNQNDWGDKDLETREFEFKDPVVLPELEDQTKHDQWTQQHLDAARLEM   |
| RAM 3   | EERKRRRQHGQLWFPEGFKVSEASKKKRRWEDVKDATQVWDTKLGELKSHL<br>GMMNRLGDRRQDLDPENDQADLSEAHQQTALDPAMLDPFDLKFEVGD     |
| RAM 4   | MERKRRRQHGQLWFPEGFKVSEASKKKRRRLFDMQDVVDRWQELEMDTISEN<br>HAPDNASRQDWNREVDLQLLTGLEPTGLDHQDKKDDLKFDAPGGAPKAE  |
| RAM 5   | MARKRRRQHGQLWFPEGFKVSEASKKKRRRPLGEDSVGLEPLDNASDGALM<br>EENQNDWGDGDKLDTERRFRFDDPVVLPDLDEQTDHKQWTQQHLKAAKLEM |
| RAM 6   | LFRKRRRQHGQLWFPEGFKVSEASKKKRRADPWWSSSTVEEDPQDHEPDLLG<br>DGALKRGRFQGNVKAQDEDDDALPLKLRMHLVMADQEEEDDMRNTNQK   |
| RAM 7   | MARKRRRQHGQLWFPEGFKVSEASKKKRRKPLGRKSVGLDPLENASDGALM<br>EDNQNEWGEDDLDTEDFRFKKPVVLPDLEDQTEHDQWTQQHLDAARLDM   |
| RAM 8   | MARKRRRQHGQLWFPEGFKVSEASKKKRRKPLGDDSVGLKPLDNASEGALM<br>EDNQNEWGDDELETEEFDFEDPVVLPRLRKQTKHRQWTQQHLDAADLDM   |
| RAM 9   | RKRKRRRQHGQLWFPEGFKVSEASKKKRRAAQAQNEEHEDDLEQVAVNMGK<br>FDVLDLSDLPDDLGLEDEETLDDMPHQDAPLFGLDGLNWWRRQTPKMSKT  |
| RAM 10  | FHRKRRRQHGQLWFPEGFKVSEASKKKRRKKKRLLLQVVPRQLSTAPNMLD<br>HWDTDDDDDDLLVAGFLNQDEEETQRPGAEMGPDAEQEEGAMDSDKLWN   |
| RAM 11  | DLRKRRRQHGQLWFPEGFKVSEASKKKRRLKKRKKQRRAPGMPELGWLQMH<br>SLNVALNNSGADTDLDEPQMFHTAEDEEDDDDFDDLVPVQGLADVETEW   |
| RAM 12  | LMRKRRRQHGQLWFPEGFKVSEASKKKRRRATFALHDDDEEEEFDDDEDED<br>DDQDEDSLWLALNHRPWTQKGGKANNKSVAQQRGPMVGGPMTLKLPLVQ   |
| RAM 13  | LQRKRRRQHGQLWFPEGFKVSEASKKKRRRRKKRKTVPAAAWLSQQPVMP<br>THTLSLQMCPNWLVLNLMGFDDDEDEEEEDDEEDDDDEANFGLGHALGL    |
| RAM WT  | MARKRRRQHGQLWFPEGFKVSEASKKKRREPLGEDSVGLKPLKNASDGALM<br>DDNQNEWGDDELETKKFRFEEPVVLPDLDDQTDHRQWTQQHLDAADLRM   |

Table S6: Sequences used for the RAM proteins.

| Protein              | Sequence                                                                                                                                                                                                                                                                                                                                                                                                                                                                                                                                                                                                                                                                                                                                                                                                                                                                                                                                                                                                                                                                                                                                                                                                                                                                                                                                                                                                                                                                                           |
|----------------------|----------------------------------------------------------------------------------------------------------------------------------------------------------------------------------------------------------------------------------------------------------------------------------------------------------------------------------------------------------------------------------------------------------------------------------------------------------------------------------------------------------------------------------------------------------------------------------------------------------------------------------------------------------------------------------------------------------------------------------------------------------------------------------------------------------------------------------------------------------------------------------------------------------------------------------------------------------------------------------------------------------------------------------------------------------------------------------------------------------------------------------------------------------------------------------------------------------------------------------------------------------------------------------------------------------------------------------------------------------------------------------------------------------------------------------------------------------------------------------------------------|
| <i>A. gamma-biae</i> | <p>RDAPMKYYYRIRTTESNPVELPEVALRRSPSLVTALPPAQRPVDEEDDKENRVRLLDRIVSEAAASNESDSSSSSSSNTIANTPRADASKPPTAAQVTPAPESPATPTQPRKNESEIKLKIQLNKNTYVSILQSPQPDEPSTHSSSSSSSSASSPGSEGAKSSSSSHKSEKSKRKRKDALATLQQMEENSRELKFKIEQMKDTGLVGSKSKSGKSSAKHHQHQQALALVPYKVELSGGLSQPSAVPDPERSDSKRLHSAKNGSNSSSSSGSSPAYCKLKIKKSSPEDSKQPHHHHPVLKIDQRSPEMATATLKFGMPRKSEKSMTPSPPLPPSPPTPPSPKQKFADEKSQFLNSFQLTPIKPAEQSSSPKTSAGAATTTATTTTPPAAVESVAPAGKKSPTSTPSVPPVAAPTNSTSPASNGTGTTTKRKAKDASSGGGVPRSGPKPKLSNDEIKAI VEKTVAENIRSPSEHIVPPIFLKPKPPTTTAAAAASGQPSPLPSSSAPTK AKDPSPKRDSRPFVFKTPPPPPPIVSANNIPAVKPSQQVLPAPVPQKH APVPIRPALTTAPKPAVPQVPQTHIRKPTAPT KLPTSAAGTGGVKSASPPA QQPLSNGSQQAAPS NATTHSVAAGANRQQKGLELKRAQSNPSINIPPPQS SAPPVTVPRDTEISKLRPEDLKKNQKVYGPQTVPEQQQQPPKPNTTTT EATG ASFVAVGPKAAPKPSSSAAAPVGNATKSSGSAQAGQGT KARPVNYLNYAL LNSKAAAAGSRTPIPSYSSSSPSYSPDSPQYSPNLFSSKQFKYANPLAYN SHLQNMLNDRRTGSTSPPGSSTSTIPASSPSPQDRPAATTPNASGNKRPA SALSPTAEDKKQQPPEKQPALLSAAAPNPADKFPSPGIPDGLSVTLATDDDD AARIKVNKQLKNNFIEIRALPEVPITEVKLPLPLPSSSTTTTASKPGRRTPPGKAVAAAAGSPATLSGSPMARKSSSSSPVPPTYVAASAPPKTTVSSAA PAPANRPADALQRKIIDLIDKPSPPSSAKTSSKPPPTMPTVSRPSTPKGGT SG- GFPPVNNGNKFKLPNATVNEGTLLKLNRYREVDLIPKGAASGAKSAPS PPSGASSRTPPPPTSSASSKSIMPIAPKPSSSQLQSFANGRMAMSPPIQRS PTATSGYQQPKSKTPPSQLPSMASMGPMFDIQMKSAAAAASGGGTTPSK KPPTSSTLTSATVPRRKIVPTSNTSLVPLKTSPVAASPSTTAGGAGSKL LSSNYSDYITLHPQGPVSSSAPPSRPLFGTPHQQQHAALTQILSENFARQC FNNLPPFYLLQQFAHHQPGAASMGSRGLGSDSVTITASPMGAARGAVSQNS LTVTAIPPGQQGGGGGGSGARGSGGGGLNGPRGGGIGGGGPNPASRNSS</p> |
| <i>B. malayi</i>     | <p>RLGPMKVLFTLQRHLEEEKPPVLDMEFMPELVAEEPLSQGSVSVAAAIETP VQLPALTVSLNTSMMEGGPNHQPIITTEVHPPP RRKKRKSTAPT KKQVASPI PVQRMTGVSPLAKGPPPLMRLENTGLSKKSVSSGRKSTEKTPAKTPPHED TPATKQAKLMPTSFDNKLQQIIDSSPSRSTKISKGSKTKTLAKAASGFAES SSKLVSNDKSMESSSKPGNKNGSLQAMKLISTDGIKTESSSSNVKTENVTN KEKTL SKLHTISKITENTTVITTISTPASTTAATATTISHPRPIQPRPLEM KTNYEALVKSYGLNGIGNKLSFFPLDGKHVGFSPPIHMQAPPLFMDPKIAA QPIKHILSGRGMPIVPEATPYLRNPALANFMHHLHMQPPPIPLPGTSTPP LLSHSSSTLSCSSSNQVTSTHSPNSNVSSKNSQQQLKHPTAVPLPPATV SS- NGSNGNKLNNSSNSRASSPAAKLQQKIVSPIPIPTAHITPFMSHS</p>                                                                                                                                                                                                                                                                                                                                                                                                                                                                                                                                                                                                                                                                                                                                                                                                                                                                                                                                                       |

|                        |                                                                                                                                                                                                                                                                                                                                                                                                                                                                                                                                                                                                                                                                                                                                                                                                                                                                                                                                                                                                                                                                                                                                                                                                                                                                                                                                          |
|------------------------|------------------------------------------------------------------------------------------------------------------------------------------------------------------------------------------------------------------------------------------------------------------------------------------------------------------------------------------------------------------------------------------------------------------------------------------------------------------------------------------------------------------------------------------------------------------------------------------------------------------------------------------------------------------------------------------------------------------------------------------------------------------------------------------------------------------------------------------------------------------------------------------------------------------------------------------------------------------------------------------------------------------------------------------------------------------------------------------------------------------------------------------------------------------------------------------------------------------------------------------------------------------------------------------------------------------------------------------|
| <i>B. mori</i>         | <p>RNEPMRFFYQIIDYVAIRNRFIDINRKRSHFHDQKLSPVSTEDTSTSSPAP<br/> NLHDHASEASSGPSSVPDDNNRNTPEVLTNDKMNVDNDESCNDKNDYSSST<br/> NKLDEDVEKSQLNSFELTAKSSCIPVKSPQKFNTEKLSLAKEVVTKSITS<br/> KVKAEDPTPDNLKRKNHTSPPTPELKKLKV EISNCLPSFSVQPSSSSISTK<br/> TEENQRKHETVDCNKNNQSAIKNNAPSATPTTRDLKQPQTVKQQVGTSKQT<br/> LDNSGVKRTVVGPQNILSPKRKPPNESTAEQAMPQQQQQQKTLSPKLLQIP<br/> KLDVAVSKTSEAPKPPKKIPDLKPSMPMLQSAHSKSPAMNKVRMDLLANNS<br/> DPTIDRSKILSQQVSSMGVQSPAQNSGDPLKSLFDSCKINIPSSLSITLTD<br/> QKSDNRCPVDTLDPKKNFTNKNLAAASSSSISAHKVPSPPVHNYIEILKLP<br/> ESDSNLKKIAKNEADSKTNSQCKPEISQTKPTTKGSETSTKGPVNLKPIA<br/> DTKLAKQAGNFSTPITFQQTFEQQLQSLQCDKKGKPKNKAQVPKLV PATPK<br/> SLSAVTKPIIPV NKPTNSSSTETKTGTALDLTTPHNIQSQQLAVQQTFDKAL<br/> ETMHSIANLAKKQNLPSK GIPMSLTHSNIFPGITSRPLTAGINSVRLSSPN<br/> TINQVKLDPNPVPTVTGNNRQESSIKSSQVKQLGNMNLTLQSPAYQIPS<br/> AHPPSNAQPSPRSQTRSPSSSPKL VIAEEKQTSTTVMEHNVSQLNQV TSTH<br/> ITNFGTPKGE LSKTLPGPSKPSLKQVKNLNTNKVSGVWPSLTSTLKT TASS<br/> SMSSNLSQHIAKHMEVNAWIKAQRRQYEFMKNMIGHQNNQNEYHKDKQ</p>                                                                                                                                                                                                                                                                                                                             |
| <i>C. intestinalis</i> | <p>HKTRPLLNIRSDQTLQDIVYKLV PGLRSDEMKR RRRRFWGENPESKKDFAIW<br/> RELSP EELGDADQFDVATFSSKVTLVLENLKR RNKKADDLREWSEIASSLS<br/> KRYLR TSDLTVNHLHKFLRAKLN EPISTEIVMLCGENVLPPTYTLADVRD<br/> TFSPVDHLLHLTYCIFVPRSLKRKPPPQRVAEKVEVEAKSRKTVAKKSSFR<br/> KKSATPHLKAFFNSQISPTTEKQQR PFLKPISDYRKQDEIESLREAEQK<br/> LIEWAAARDTRAKLPLFEKLQLT TVQRAAAIKRAALYKLANQKKAKEKQ EY<br/> INSAASSSVQKLPQKKLDSQNEQTKLKSTKNEYKVTAQVPKGTNSP RRNIK<br/> QGSNEQFPSTGRWLNKQNNNRTRPTRVKCYSVLNIPVDEAVRSK PPTPVVD<br/> PLCPPVVLKRSSADPDNEAPPTKM KPFVQRTANNEVPMLNLEHGNNK VAP<br/> KQQQFQRNRRKPIHPTHASAGR TDSPGTVLLQKIDTSKTQFSTTPTRPIS<br/> REPDRQQAGFD TIRIQSPNNGKFILLSTEGMERGHSQSHPAGLSMKLHSQM<br/> QQNRSSNDPRKLDNQG TMLNTANQDSQNK SQFQTRINSQAHRALDAVRNT<br/> MGKVLLQAERPRQMPLKR PILPKGVSKPIHTGVGSIPIRLPTNQTRNIFQN<br/> EQVIYPMNKTVASSAASTSQSKAPI RTQPKPSPKSLSNNELEQLKKLREQQ<br/> DFLNKLTEAAAINQLANRKKSS TDNSPQTSNQPSTFR IKQHLSSQDNNRG<br/> RPPVLQADARVIPSPRFSQPS PAFQK PITQKPFERINSTSTRGRFQNSA<br/> PVSSPSLNRNSFPMRPTPQPNSNSHVNKQAQFTR LASGVQINSRPQQPSAK<br/> TLLQSR AQDRPVGITPAEMQQR RQYK TNPSTSIANNGRYNQQFGSRPPR<br/> FQQQQQQQHPLPVPRQFMLPKSNTNPRQQTFQLRSSPNASMRHP IATNQ R<br/> TRQVPSIIRRSFEKMNPRPKSVTPTNRGQIQARSNLHSRQAHVVRST SHE<br/> VLAPTATPPAGTKSPWSSRGYPLPAVPTAHPSEYATQHEIHKPPLAHQQPS<br/> SNNFARASTSIKTNALPLSDMQPLEL T AKKNTNSTKQTIDDGAGQSNSDQP<br/> LCLVMKK</p> |

|                               |                                                                                                                                                                                                                                                                                                                                                                                                                                                                                                                                                                                                                                                                                                                                                                                                                                                                                                                                                                                                                                                                                                                                                                                                                                                                                                                                    |
|-------------------------------|------------------------------------------------------------------------------------------------------------------------------------------------------------------------------------------------------------------------------------------------------------------------------------------------------------------------------------------------------------------------------------------------------------------------------------------------------------------------------------------------------------------------------------------------------------------------------------------------------------------------------------------------------------------------------------------------------------------------------------------------------------------------------------------------------------------------------------------------------------------------------------------------------------------------------------------------------------------------------------------------------------------------------------------------------------------------------------------------------------------------------------------------------------------------------------------------------------------------------------------------------------------------------------------------------------------------------------|
| <p><i>D. melanogaster</i></p> | <p>RDAPMRFYYRVYESPQPLVKPAPRRVLPLKLEKQERENQEQQLAVEVASSK<br/> VEPVSLAEDQKAEASIKVEGEESTREIVKEVIKDDVAATPPTETLKLVINRN<br/> MLDKREKSHSPQLSSKSSSKSSPCTPVSSPSEPNIKLKIDLSKQNSVTIID<br/> MSDPERREIVKPLKPEKESRSKKKDKDGSPKSSSSSSSSSSGERRKSPSP<br/> LTVPPLTIRTERIMSPSGVSTLSPRVTSGAFSSEDPKSEFLKSFALKPIKVK<br/> VESPRTLNNRAITPPSPSVQQSASPKSKGNNLDDSILMKPPSCMPPKSIA<br/> SSKRKSKEPVKAVSKKQKLSPLPTVDFKIRLPVTNGNSSGTASPKEKPL<br/> MPPPAKPPMLAPRKLQPSAQFAPPPSPIHHHAGVQMSAPGNRTPIAKRYQP<br/> ILPKASRPNPFANIPNDVNRLLKDAGTEIKSIGGGSVENNSNSAQKPHLYG<br/> PKGETKMGPPALPATTSPQGNKNVGKQAGNLPMSAPPNKGNSNNYLNLAL<br/> FNSNKCKGKEAPPGCRTPMYTPNSPIYSPSSPQYVPSYNIPTMPTYKYTPK<br/> PTPNSGSGNGGSGSYLQNMLGGGNGGSLGGLFSPPTKSDQNTNPAQGGGG<br/> SSSATQSGGNGGIVNNNIYMPNEDAPEKQQQVKVKSLLNSCNINIPSSLSIT<br/> ISRDNGDSSSPNNGQHPKHKSPVNNYIEIVKLPDQPQDQVQAAKEAQKRQS<br/> PAAVPGHLAAKLPPPPPSKAIPSPQHLVSRMTPPQLPKVATPPPPSSPRV<br/> ITPPKTSPPANAANKVTPLKPVLTPTQVDKKTSPSEKRTAAQMGSHSPTASE<br/> NKSPKGGAAGVANSTGGTQNGDPAAKKFRPILPRQNGMPELAPKLPTLAPF<br/> VGFNPLQNPAAGKKVPPSKKSPNAGAAAHQSGQQKLVNGGQPQSAQQKTSP<br/> PAQKNQQQVKKVSKNPTPPPPSLPAVGKMMPHPVMHSQNAPLSIASSASAA<br/> AVASGQLDLSNFLKENLRRVHAAQAAQAAQVAAAANQSNMMYNLAQMGMHT<br/> PAMYNYQQAYFREQLSRMQRVGNVEFNDYLQKLKTAAATGGGGPVEGELKP<br/> MLPTVTLPSPGATPPAASPKTSPPLPAGKLTAATAPQTKGNSSSGAANARQ<br/> QTAATGNNGATVPAASLPPATKSK</p> |
|-------------------------------|------------------------------------------------------------------------------------------------------------------------------------------------------------------------------------------------------------------------------------------------------------------------------------------------------------------------------------------------------------------------------------------------------------------------------------------------------------------------------------------------------------------------------------------------------------------------------------------------------------------------------------------------------------------------------------------------------------------------------------------------------------------------------------------------------------------------------------------------------------------------------------------------------------------------------------------------------------------------------------------------------------------------------------------------------------------------------------------------------------------------------------------------------------------------------------------------------------------------------------------------------------------------------------------------------------------------------------|

|                                |                                                                                                                                                                                                                                                                                                                                                                                                                                                                                                                                                                                                                                                                                                                                                                                                                                                                                                                                                                                                                                                                                                                                                                                                                                                                                                                                                                         |
|--------------------------------|-------------------------------------------------------------------------------------------------------------------------------------------------------------------------------------------------------------------------------------------------------------------------------------------------------------------------------------------------------------------------------------------------------------------------------------------------------------------------------------------------------------------------------------------------------------------------------------------------------------------------------------------------------------------------------------------------------------------------------------------------------------------------------------------------------------------------------------------------------------------------------------------------------------------------------------------------------------------------------------------------------------------------------------------------------------------------------------------------------------------------------------------------------------------------------------------------------------------------------------------------------------------------------------------------------------------------------------------------------------------------|
| <p><i>D. pseudoobscura</i></p> | <p> RDAPMRFYFRVYESPQRQVKPPP RRMLPAPLKVVKQEPTPAP EAPKVEQTS<br/> PTAAPVSPPASIKQELQEIRVPSEQPLKLIINRNMLEKREKSHSPQSSKS<br/> SAKSNHHTPTTPSSSSSSSSSCSPSPSGELNIKLKIDLSKHNSVTIINMSDPE<br/> RKEIVKPLKPEKESRSKNRSKDKDGSPKSSSSSSSERKRRKSPSPLTVPPLTI<br/> RTERILSPSGVSTLSPRCVASSSCHEDPKSEFLKSFALTPIKVKVESPERS<br/> PSSHRAPTTPPKTTASGSGSGSHSHHSGRSKGTLEDRELMRPPAGMAPKSIA<br/> SSKRKSKEPVKAVSKKPKLSPPLPREDFKIRLPATNSHSHPPPAPTTPPPF<br/> VGSLEKLMPPPPKPPMLASRKQPQLAAQFAPPSPHHPGMQMAAPGNRTPIAK<br/> RYHPILPKAARNPNPFANIPNDVNRLLKDAGTEIKSIGGSTSASSAKSHVYG<br/> PKADSKMGPPPPPAGAAAPHAARHTSGGQGKTGGNNQPQPHPAPSSNGSQN<br/> KAANNYLNLALFNASKSKGREAPPGCRTPMYTPNSPIYSPSSPQYVPNYNI<br/> PTMPTYKYTPKPSQATAGSYLQSM LGGGGGASGSGGGSLFPPSPPTKADQNT<br/> NPAGAAPSSGHAFQRGASPSHEDAPEKQQVKVK SLLNSCNINIPSSLSITI<br/> SRDNGDSSSASNGSHPKHKSPVNNYIEIVKLPDQPQDQGGKSAASVTEAQK<br/> RQSPAPAPGRTPPPQLPAVAAPAPAAAAMRLTQPPPSKAIPSPQHLM SRM<br/> TPPQLPQTAPPSSPSTATRGITPPKISPPASGKGTPLKTVLTPSQADSKK<br/> TPSPEKRSAAQMGSHTASENKSPKLAGQSAPGSATPNGDPAAKKFRPIL<br/> PRQNAQIPDMAAKLPSLAPAFNFSQPQSQVQTGAKKVPTSKKSPNGGA AVF<br/> LPPPPKLPNGSHPAQKPSPPPKSQQTSGKKANKNPTPPSSSAALGGGVQG<br/> NMGKLMPHPGLPGLNAPLSIASSAAAAAGQMDLNNFIKENLIRAQVAQAAQ<br/> AAQAAQAAANQSNILYNFAQIGHMSPAMYNYQQAVFMEQLTRMQRAGNEAF<br/> NDYLQKLNANAANGQAGDGDHKPIMPMLPTVNLPSPTSATSAA SPKTSALPN<br/> GKLTAAATAPSSHTPSSLAKAGSGASPRQQTAATPAAPLVAATKSK </p> |
|--------------------------------|-------------------------------------------------------------------------------------------------------------------------------------------------------------------------------------------------------------------------------------------------------------------------------------------------------------------------------------------------------------------------------------------------------------------------------------------------------------------------------------------------------------------------------------------------------------------------------------------------------------------------------------------------------------------------------------------------------------------------------------------------------------------------------------------------------------------------------------------------------------------------------------------------------------------------------------------------------------------------------------------------------------------------------------------------------------------------------------------------------------------------------------------------------------------------------------------------------------------------------------------------------------------------------------------------------------------------------------------------------------------------|

*D. virilis*

RDAPMRFYFRVYESPQPLMKPALPMTLPAKPOVKQELATPVVTPTSSPPAA  
AALVKSPSPSPPAVAAAAATAQPLARIKLEQPQDEFRIAPKLPSPTEQSLK  
LFINRNQLEKQEKLPHERHHHHHHHHHSPKAAKSSPTTPTANSKFPPTGNY  
NKEEPNIKLKIDLSKQNSVTIINMSDPERKEIVKPLKPEKESRSKSKKDKD  
GSPKSSSSSSSSSSSTSSSTSSERKRKSPSPLTVPPLTIRTERILSPNGV  
STVLSPRVTSGACLEDPKSEFLKSFALTPIKVKLESPKASHAAPPAP  
PAAKSKTHLDDSLLMKPPSAMPPKSIASSKRKSKEPVKAVSKKPKLSPPLP  
REDFKIRLPAPNSCPSPPPPMLAAPVEKPLMPPPPAKPLPVPAARKAQLPH  
SPYPVHAPLPPHHQGMQMAAPGNRTPIAKRYQPILPKAARNPFANIPSDV  
NRLLKDVGTEIKSIASQAKTHVYGPKMPEHKMGPPSAMHKKPNNNSNNHNSN  
NNNNNSNSNNNNKSNYLNALFNASKSKGKEAPPGCRTPMYTPNSPIYSP  
SSPQYVSNYNIPTMPTYKYTPKPTTTNNSNNSNNNNSTTATTNASNYLQ  
SMLNGTGAGGAGGGGLFPTPTKTQDQNTNPAAEDAPEKQQVKVKSLLNSCN  
INIPSSLITISRDNGDASSPSSGGHAKHKSPVNNYIEIVKLPDQPAASAE  
QKEPTAAAKATPTPTPQPPVKLPAPPSKTIPSPQHLLARLTPPAAAATAAA  
VPAKTSPKATATAKPVLTQQSDKKTSPSEKRAASQGSHPNSSENKSPKS  
AQATSAAGASGCATPNGGESAAKKFRPILRQNAATNGGATTEPKLLPQQP  
VGYNFAANLPNSKKVPASKKSPGAGGAIGGGGGGGSGTPAKLAHANGSSQA  
LCKAGAKHKLATPTPPAALGSSLKFMGPPTGHAHPHLPNPAPLSIASSAN  
QLDLSNFLKDNLRAQAAAQVAQAAAAANQSNLLYNFAPAIYNYQQAYLMDQ  
LSRMQRAGNEVFNDYLQKLKSAAIAGGEGAAGEHRQPVMPLPTVTLPTAA  
SQPIAASPKTSPHAAAHKLTPAATPTPTLAKSNSSSSSSGGGGGSGSARPQA  
AATSNNALAKSK

|                              |                                                                                                                                                                                                                                                                                                                                                                                                                                                                                                                                                                                                                                                                                                                                                                                                                                                                                                                                                                                                                                                                                                                                                                                                                                                                                                                                                                                              |
|------------------------------|----------------------------------------------------------------------------------------------------------------------------------------------------------------------------------------------------------------------------------------------------------------------------------------------------------------------------------------------------------------------------------------------------------------------------------------------------------------------------------------------------------------------------------------------------------------------------------------------------------------------------------------------------------------------------------------------------------------------------------------------------------------------------------------------------------------------------------------------------------------------------------------------------------------------------------------------------------------------------------------------------------------------------------------------------------------------------------------------------------------------------------------------------------------------------------------------------------------------------------------------------------------------------------------------------------------------------------------------------------------------------------------------|
| <p><i>D. willis-toni</i></p> | <p> RDAPMRFYFRVYETQQQPALPPPPTSTSIISAPGATTPRRILPLKLEKREI<br/> SPPAVVIKAPSPSPSHPPASSPTPPTQKEHVPNAAVVTTPTVSPSHAPRI<br/> KQEKQEEFRIATKQLASPT EPLKLVINRTHYSPLSIASSASKMSSKSSHHH<br/> HNQPPTATTAAPSSPAAPQPPSSPKDEPNIKLKIDLSKQNSVTIINMNDPE<br/> RKEIVKPLKPEKESRSKSKKDKDGSPKTSPSSSSSSNGERKRKSPSPLTVP<br/> PLTIRTERILSPNGVSTLSPRITSGGLSEDPKSAFLKSFALTPIKVKVESP<br/> EKMLASTPSKLMKTNVDDSLLMKPPSSMPPKSIASSKRKSKPEVKAITKKP<br/> KLSPLPLREDFKIRLPGSPA AKSDDKPLMPPPMKPPMIAPRKQQQQQQQQQQ<br/> QQQLQQQSSGQFPVPSSPLFQGMQMAAPGNRTPIAKRYQPILPKAARP NPF<br/> ANIPNDVNRLK DAGTEIKSINSSSHANNKPHVYGPKTD AKMGPPPAPGRH<br/> VTNGGIAKPTNNHNNNQGSTSSSTSSSSSAAAGAAGLNSKSNNYLNLALFN<br/> ASKSKGKEAPPGCRTPMYTPNSPIYSPSSPQYVPNYNIPTMPTYKYTPKPS<br/> TQASNYLQNILGSSSGAAAGNGGGLSAGLFPSPPTKADQNTNPAKSNTPPA<br/> AAAGASFNQRSASPNE DAPEKQQVKVKSELLNSCNINIPSSLSITISRDNGD<br/> SSSASNGAHPKHKSPVNNYIEIVKLPDQTPNAESQKRLSPPAPPISTASTG<br/> VTSSAPAPSVMKLPPAPPSKTIPSPQHLMSRLTPPQLPPVAAANPPRVITP<br/> PKTSPTNVKATPMKPVLTPTQGGDKKTPSPEKRSANHSPTASENKSPKSAG<br/> GSSSSSSSTSNGDPAAKKFRPILPRQNALPELAPKYSPQTNQQQQQQAHNV<br/> SAAVNNNNNSNNNNNNNVN KSKVQPSKKS PNTPNAAASGQKMSPPGQKQSP<br/> TLKKTAKNSTSTPPSQNKLMHPGLAPLSIASSAAAAGQLDLSNFLKENLI<br/> RAQAAQVAAANQSNLLFNFAQIGQLPAMYNYQQACFMEHL SRMQRAGNEVF<br/> NDYLQKLKTAAGANGNGNGVDVDYKPPVMPMLPTVTLPSLSNPGTAAASP<br/> KTSPLPTGKLTAATPALALGAKGGNAASPRQQTAATSNGNRPSTPHSTTA<br/> TPPPPPAAAAAKSK </p> |
|------------------------------|----------------------------------------------------------------------------------------------------------------------------------------------------------------------------------------------------------------------------------------------------------------------------------------------------------------------------------------------------------------------------------------------------------------------------------------------------------------------------------------------------------------------------------------------------------------------------------------------------------------------------------------------------------------------------------------------------------------------------------------------------------------------------------------------------------------------------------------------------------------------------------------------------------------------------------------------------------------------------------------------------------------------------------------------------------------------------------------------------------------------------------------------------------------------------------------------------------------------------------------------------------------------------------------------------------------------------------------------------------------------------------------------|

|                             |                                                                                                                                                                                                                                                                                                                                                                                                                                                                                                                                                                                                                                                                                                                                                                                                                                                                                                                                                                                                                                                                                                                                                        |
|-----------------------------|--------------------------------------------------------------------------------------------------------------------------------------------------------------------------------------------------------------------------------------------------------------------------------------------------------------------------------------------------------------------------------------------------------------------------------------------------------------------------------------------------------------------------------------------------------------------------------------------------------------------------------------------------------------------------------------------------------------------------------------------------------------------------------------------------------------------------------------------------------------------------------------------------------------------------------------------------------------------------------------------------------------------------------------------------------------------------------------------------------------------------------------------------------|
| <p><i>I. scapularis</i></p> | <p>RDVPLQLFYRISENVARAPGPLPTGVAVMTAPPGLAGDGATREGAPQQQAAQ<br/> QQGPPRGDSSKGPFLKDSVNFPGSSRSCKDAGTTPEGTDSTAKPLTTEEA<br/> SDTKPACSDGTPGRAEPKVQSKADVAPTSTPPLDKSVPDLKAPTALKAAAT<br/> KAKTPAPVQAKDVTEPVPENCRQLAKAKPYCDQTCTVVPKSPVHGAEPGSAE<br/> RSIPTGAAKCEKDSPCRPTAMPTEAEKSKTGVPPIRLKVPAAECLLAKAHV<br/> HDVPAAEELPRTAAKASSRADKEKALLQVGCSTPSGEDGSTARVEGASVTT<br/> IDRPPPVTLPNGAAKDLLKDLSEKLVKGVLELDPSSKRASLGSATAVES<br/> GVDPKLVNHTATPTIEDVVEAVSAIPEPVVQVSVAAEVLESAKLQTCFSR<br/> AADKARAKINALKAAASLKETSKAAVAEEKANEVVGSLVTLRANRQGAKGQ<br/> LDCPVDKPAQKVASVAVSPPPVSPEKKNVLPSELPAATTSGATANRPVA<br/> TAVPTYMTLSKSHPSLFHSSPRKRGRPLATVNSLNEEIERAHMMAKRQQA<br/> TAEKPKPAIPVITSLRIKPIPPPPPETPPPVDRAATGAEVPESERLQRRGS<br/> QSEVSEEKSDAEDSSGRRKSRRRRGPMELRNVVTQLKDMTLEKEQQAATQE<br/> PLRNLPGGPPSPAPAAAIPKITL RVTRDEKSNLKEKQLRPAAA AVVAET<br/> LHDSGFCEDVVAEGSRSPASEVKPKIEAATKTVRPTAPREPPLPSPCRKPD<br/> VAAAHHGNSKKDMRKSRRRSVEDWVNEQSKWVRAHKAAA AVGGGDATPSP<br/> KAAKEHEDERPKRRPSLEPPPAKGGQRRGRKRTNPVKITKPD PVVDAQQE<br/> KAASGSPPLTGGAPEKKGTTTATPPLVEKAEPSEAPARCPAGGPREPGKSR<br/> RELESPPKKLSELVIPRYIPNPATSIPLTITHARNKRLRETDKAPESASTC<br/> RRRIPSTPKQTGGERTRRRASSRRR</p> |
| <p><i>D. pulex2</i></p>     | <p>EREPLRLWYRISPTIKEEPIQRKTTTPPAEEVKVKNQRASLVDITSKRSW<br/> QCNGKEERTKRRKRSSAEKVAEKIQRMTP EASSVDSLVPVAKTIFDEAR<br/> TAEFSCSTPIPSAGSTAPPLETDSGESNKIHNWLPKAVFDLDDRALFAKRL<br/> QRITNPSEFRPEEVKEEEPQVDKTDKEVVVPTTKEESIESP DPLAPLRCV<br/> TPDPTGATSGGP DDEIHDSIGALDLSGSKGDSSDVSSPLSAGSCRSSASPV<br/> GSTSKMGPHYPFMTPSAVYHHVQQQDPAQSMAVLEAAAQSSTCSANNTKNL<br/> SSDDVKKPPIWDLFHQHIRPSTAHSSQQAQSLDLLKSNPPLIFRGNNNKK<br/> KSKKTPAGKKFPSSSPNSAKGEFDPAFLYKVVT</p>                                                                                                                                                                                                                                                                                                                                                                                                                                                                                                                                                                                                                                                                                                  |



|                           |                                                                                                                                                                                                                                                                                                                                                                                                                                                                                                                                                                                                                                                                                                                                                                                                                                                              |
|---------------------------|--------------------------------------------------------------------------------------------------------------------------------------------------------------------------------------------------------------------------------------------------------------------------------------------------------------------------------------------------------------------------------------------------------------------------------------------------------------------------------------------------------------------------------------------------------------------------------------------------------------------------------------------------------------------------------------------------------------------------------------------------------------------------------------------------------------------------------------------------------------|
| <i>D. pulex1</i>          | <p>RKGPMRLKYRIYQRLQSSSPLTNGTNGSEEAPOKIKEEAVAEDKKMTNEVQ<br/> LEISECGVMSVNPVDAKNGIPEETQPTIPNTSSEKPEEVKAPSPKPEASSE<br/> APLVCVTVSTDISADLNGETSVNCSPSVDVKTGDSVEVKTITITVNEPTIT<br/> TGTTSSDTASNPPASHLTSSARNKIPSSSTGHKTLKPPSSSWNQNVNRVGTK<br/> RPSSSVACNDGGSLNLANA EQTLTPAKRATPSSPLKTPRFFKVRNASQPT<br/> DTNGGTCKATGTSIASVTESPVQEVAVNLTKASSSPKKPTDKERSSREGKE<br/> GKAPSPRPDIGSNPIRPYSVPVPSQSKRQPSPNLAAEDAAARLRHLLNPIS<br/> SAASTTTSPSSGDSSVQQLRFPAAAWLNLRGVPNRNPVPLALGPGSPFNRR<br/> PPLSPAHFISFIASHPHYLYLSPMGLPPAPDSKKSLPSSSTASSSSSSIPS<br/> PQMHEKSISSRTSNSFPTPTFNLNTLQQCTYPSSLSPLLPNLPRELVGSFYH<br/> SSYVPRPFMSARGGPLSVSPKSVSSSSSVGSNSSGGGFHPSMPPTVTTTTTS<br/> NSSSSAAGRKSSPGLRPTVPRRNVAAPPPLVPIGTPSSVRSPTLLPIKDI<br/> VEKESCAKSTSPAASNCTSVVESCVPQMEEEIVKSGPVSKSTDGKPV DST<br/> SENQHSSAKENGKVI GDADSGKANTPAASPLEGSINKTTTDDNANVVLENKS<br/> ESKVEIAAPAPS</p>        |
| <i>D. pulex1<br/>Act1</i> | <p>RKGPM DLEYDIYQDLQSSSPLTNGTNGSEEAPOEIEEEAVA EDEEMTNEVQ<br/> LEISECGVMSVNPVRAKNGIPKRTQPTIPNTSSKKPKKVKAPSPKPKASSK<br/> APLVCVTVSTDISA ELNGETSVNCSPSVNVETGKSVKVDTTITVNEPTIT<br/> TGTTSSKTASNPPASHLTSSARNKIPSSSTGHKTLKPPSSSWNQNVNRVGTK<br/> RPSSSVACNRGGSLNLANARQTLTPAKRATPSSPLKTPRFFKVKRASQPT<br/> RTNGGTCDATGTSIASVTESPVQDVAVNLTEASSSPDEPTSSNRSSRK GKK<br/> GKAPSPRPKIGSNPIRPYSVPVPSQSEEQPSPNLAAEDAAAKLEHLLNPIS<br/> SAASTTTSPSSGRSSVQQLDFPAAAWLNLRGVPNRNPVPLALGPGSPFNNE<br/> PPLSPAHFISFIASHPHYLYLSPMGLPPAPRSKKSLPKKTARRSSSSIPS<br/> PQMHE SSISSRTSNSFPTPTFNLNTLQQCTYPSSLSPLLPNLPSSLVGSFYH<br/> SSYVPRPFMSARGGPLSVSPE SVSSSSSVGSNSSGGGFHPSMPPTVTTTTTS<br/> NSSSSAAGRKSSPGLRPTVPDEEVAPPPLVPIGTPSSVRSPTLLPIKDI<br/> VKKKSSCAKSTSPAASNCTSVVKSCVPQMS E EIVRS GPVSKSTDGKPV DST<br/> SENQHSSAKKNGKVI GRADSGEANTPAASPLDGSINDTTTDDNANVVLE NDS<br/> EEEVEIAAPAPS</p> |

|                                         |                                                                                                                                                                                                                                                                                                                                                                                                                                                                                                                                                                                                                                                                                                                                                                                                                                          |
|-----------------------------------------|------------------------------------------------------------------------------------------------------------------------------------------------------------------------------------------------------------------------------------------------------------------------------------------------------------------------------------------------------------------------------------------------------------------------------------------------------------------------------------------------------------------------------------------------------------------------------------------------------------------------------------------------------------------------------------------------------------------------------------------------------------------------------------------------------------------------------------------|
| <p><i>D. pulex1</i><br/><i>Act2</i></p> | <p>RKGPMDLEYDIYQDLQSSSPLTNGTNGSEEAPEIEEEAVAEDDEMTNEVQ<br/> LEISECGVMSVPNVKAKNIGIPKRTQPTIPNTSSKKPKKVEAPSPKPEASSK<br/> APLVCVTVSTKISAKLNGKTSVNCSPSVDVRTGKSVKTTITVNKNPTIT<br/> TGTSSDTASNPPASHLTSSARNKIPSSSTGHETLKPPSSSWNQVNRVGT<br/> EPSSSVACNDGGSLNLANARQTLTPAKRATPSSPLETPRFFKVENASQPT<br/> RTNGGTCKATGTSIASVTESPVQRVAVNLTEASSSPRKPTSSNDSSRKGED<br/> GKAPSPRPKIGSNPIDPYSVPVPSQSRKQPSPNLAAKKAALKLEHLLNPIS<br/> SAASTTTSPSSGRSSVQQLDFPAAAWLNLRGVPNRPVPLALGPGSPFNRR<br/> PPLSPAHFISFIASHPHYLYLSPMGLPPAPRSKKSLPEETARRSSSSIPS<br/> PQMHEISSRTSNSFPTPTFNLNTLQQCTYPSSLSPLLPNLPSSLVGSFYH<br/> SSYVPRPFMSARGGPLSVSPESVSSSSSVGSNSSGGGFHPSMPPTVTTTTTS<br/> NSSSSAAGKKSSPGLRPTVPKEEVAPPPPLVPIGTPSSVRSPTLLPIKRI<br/> VDKRSSCADSTSPAASNCTSVVKSCVPQMSKKIVRSGPVSKSTDGKPV DST<br/> SENQHSSAKKNGKVIGDADSGEANTPAASPLRGSINDTTTDNANVVLEND<br/> EEVEIAAPAPS</p> |
|-----------------------------------------|------------------------------------------------------------------------------------------------------------------------------------------------------------------------------------------------------------------------------------------------------------------------------------------------------------------------------------------------------------------------------------------------------------------------------------------------------------------------------------------------------------------------------------------------------------------------------------------------------------------------------------------------------------------------------------------------------------------------------------------------------------------------------------------------------------------------------------------|

Table S7: Sequences used for the PSC proteins.
